# Supplementary material for: Surface peptide functionalization of zeolitic imidazolate framework-8 for autonomous homing and enhanced delivery of chemotherapeutic agent to lung tumor cells
Source: Royal Society of Chemistry journal article supplement (doi:10.1039/d1dt00116g), 2021-01-01
Supplement: d1dt00116g1.pdf [file d1dt00116g1.pdf]

## Supplementary Information

### Surface Peptide Functionalization of Zeolitic Imidazolate Framework-8 for Autonomous Homing and Enhanced Delivery of Chemotherapeutic Agent to Lung Tumor Cells

Nurul Akmarina Mohd Abdul Kamal,<sup>a,b,c</sup> Emilia Abdulmalek,<sup>a</sup> Sharida Fakurazi,<sup>d</sup> Kyle E. Cordova,<sup>e,\*</sup> and Mohd Basyaruddin Abdul Rahman<sup>a,b,\*</sup>

<sup>a</sup>Integrated Chemical BioPhysics Research, Department of Chemistry, Faculty of Science, Universiti Putra Malaysia (UPM), Serdang 43400, Selangor, Malaysia. \*E-mail: basya@upm.edu.my

<sup>b</sup>UPM-MAKNA Cancer Laboratory, Institute of Bioscience, UPM, Serdang 43400, Selangor, Malaysia.

<sup>c</sup>Faculty of Chemical and Process Engineering Technology, Universiti Malaysia Pahang (UMP), Pekan 26600, Pahang, Malaysia.

<sup>d</sup>Department of Human Anatomy, Faculty of Medicine and Health Sciences, UPM, Serdang 43400, Selangor, Malaysia.

<sup>e</sup>Materials Discovery Research Unit, Advanced Research Centre, Royal Scientific Society, Amman 11941, Jordan. \*E-mail: kyle.cordova@rss.jo

## Supplementary Figures

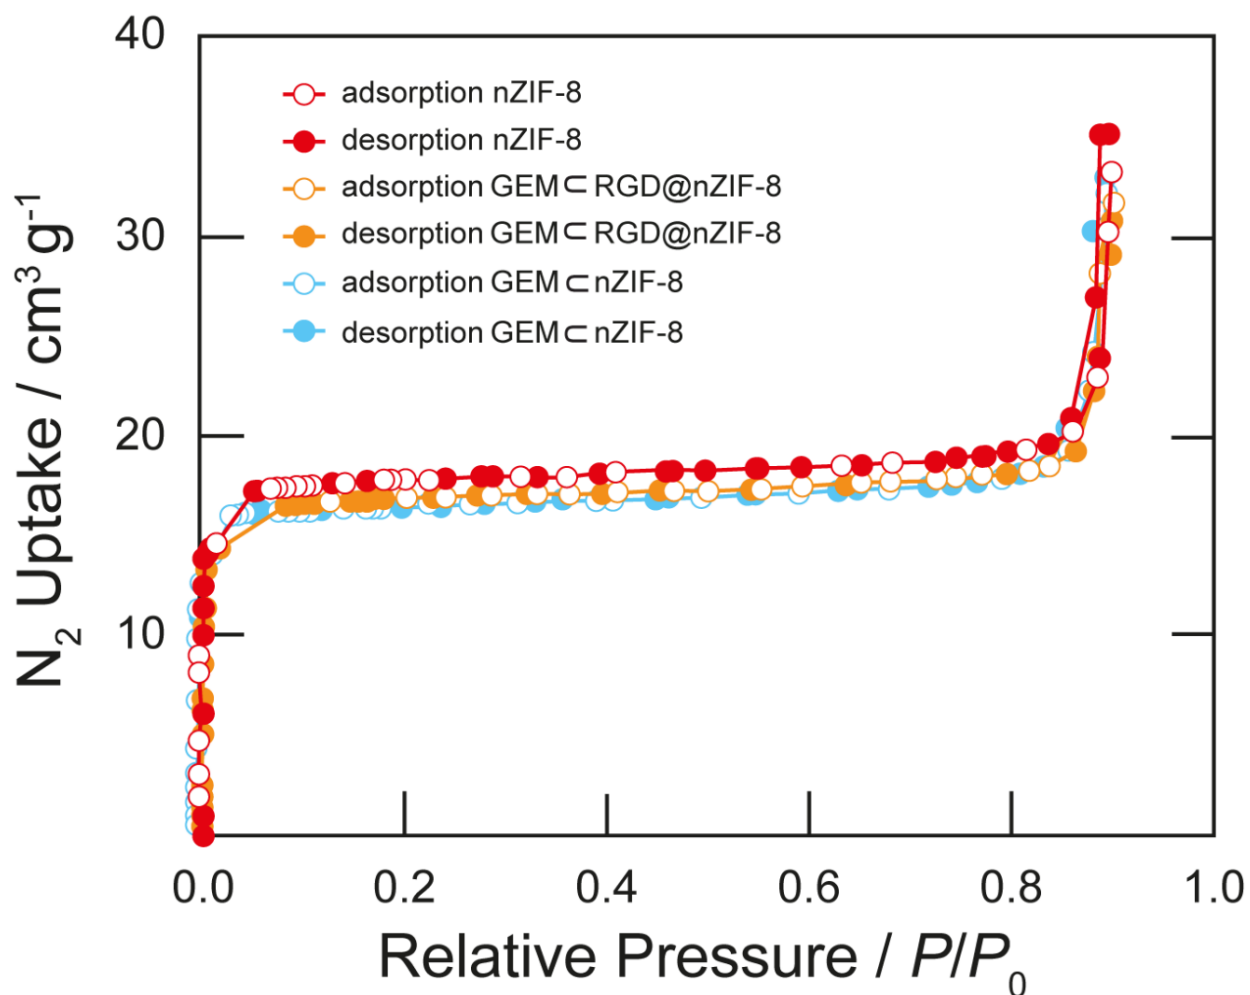

**Fig. S1.** N<sub>2</sub> Isotherm for nZIF-8 (red), GEM⊂nZIF-8 (blue), and GEM⊂RGD@nZIF-8 (orange). Open and solid circle represent adsorption and desorption, respectively. Connecting traces are for guidance only.

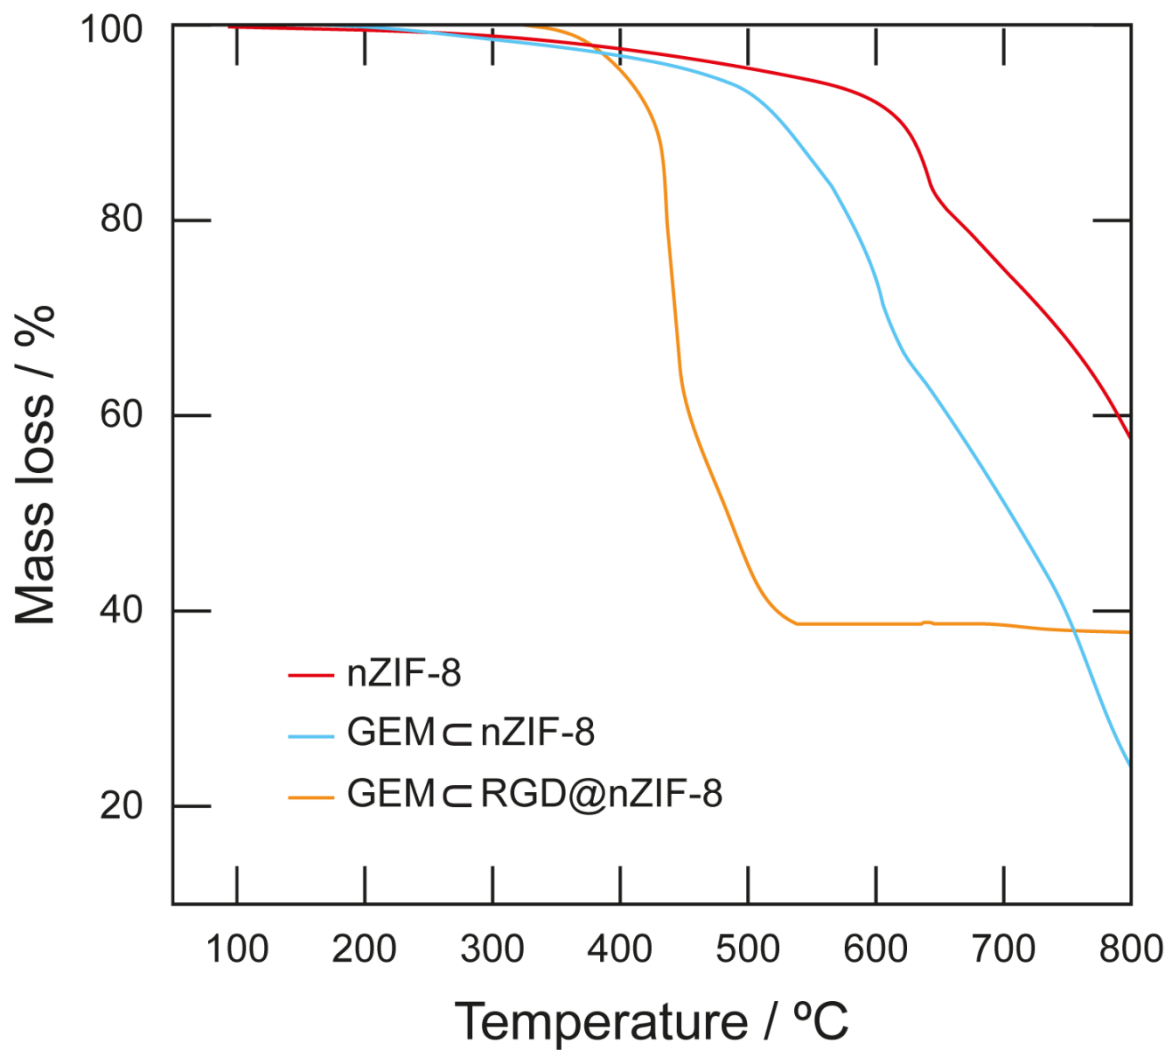

**Fig. S2.** Thermal gravimetric analysis (TGA) under N<sub>2</sub> flow of nZIF-8 (red), GEM@nZIF-8 (blue), and GEM@RGD@nZIF-8 (orange).

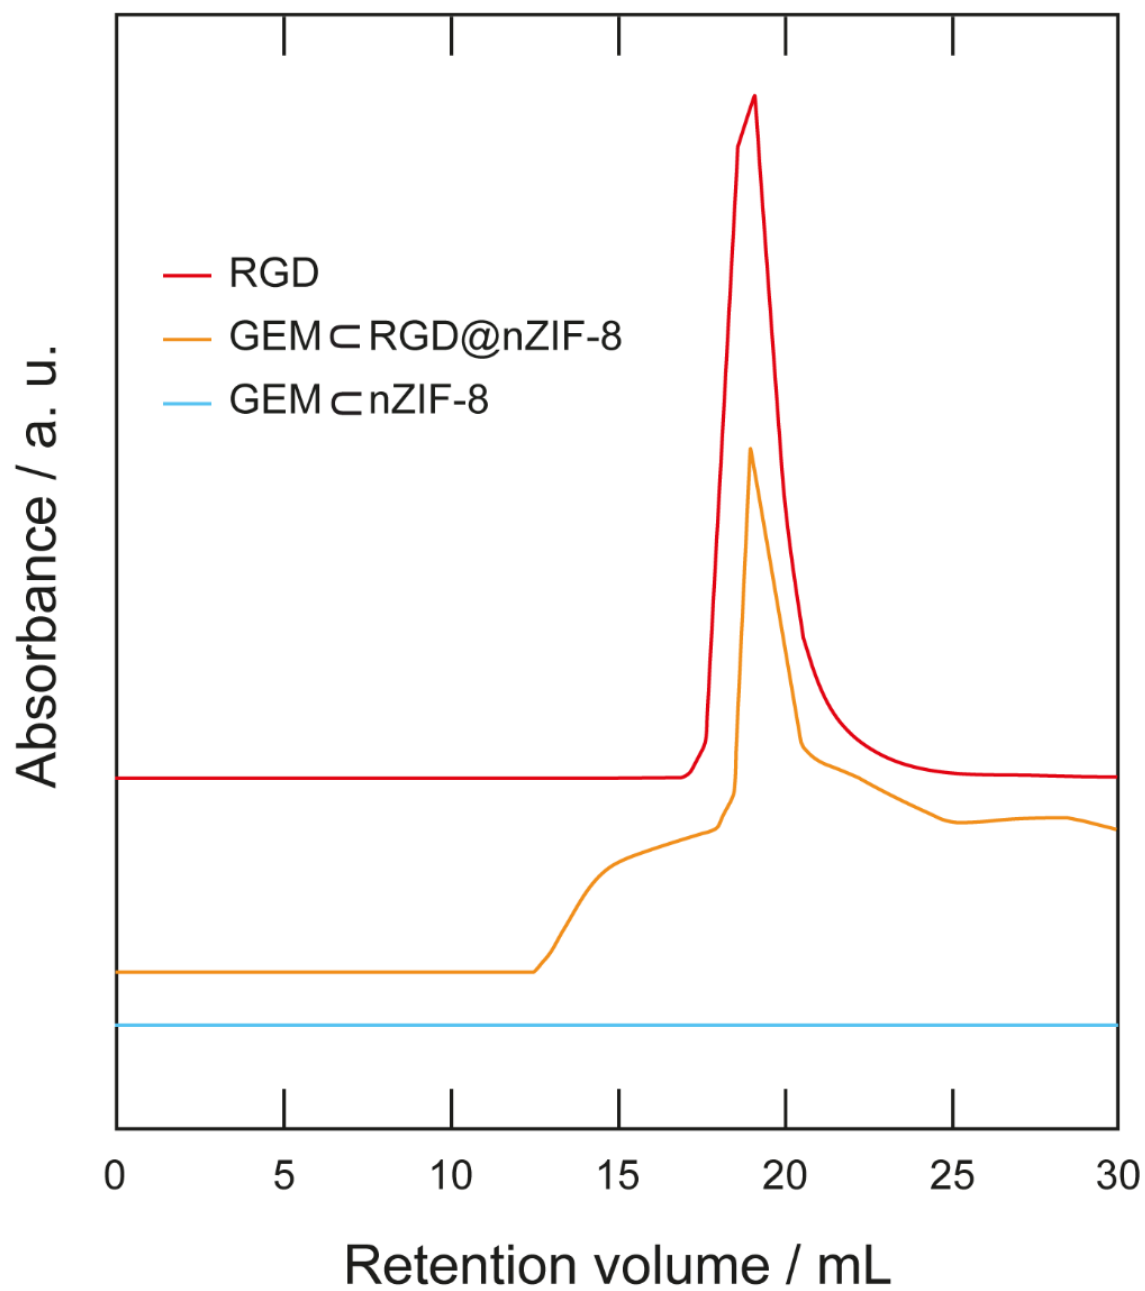

**Fig. S3.** Size exclusion chromatograms comparing acid-digested GEM⊂nZIF-8 (blue) and GEM⊂RGD@nZIF-8 (orange) with the chromatogram of the pristine RGD homing peptide ligand (red).

A)

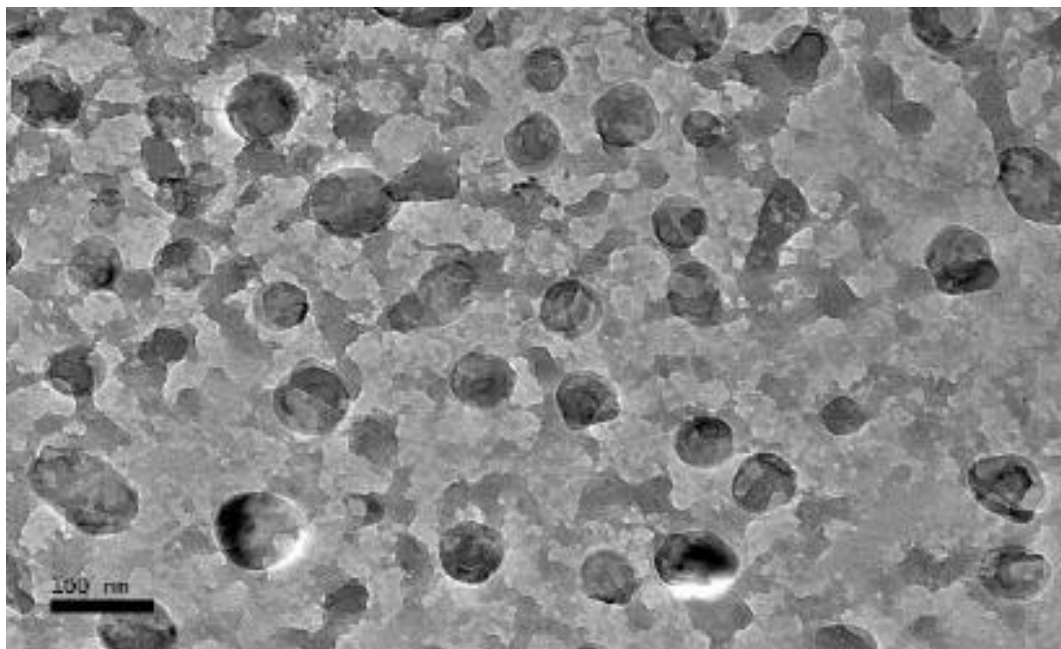

B)

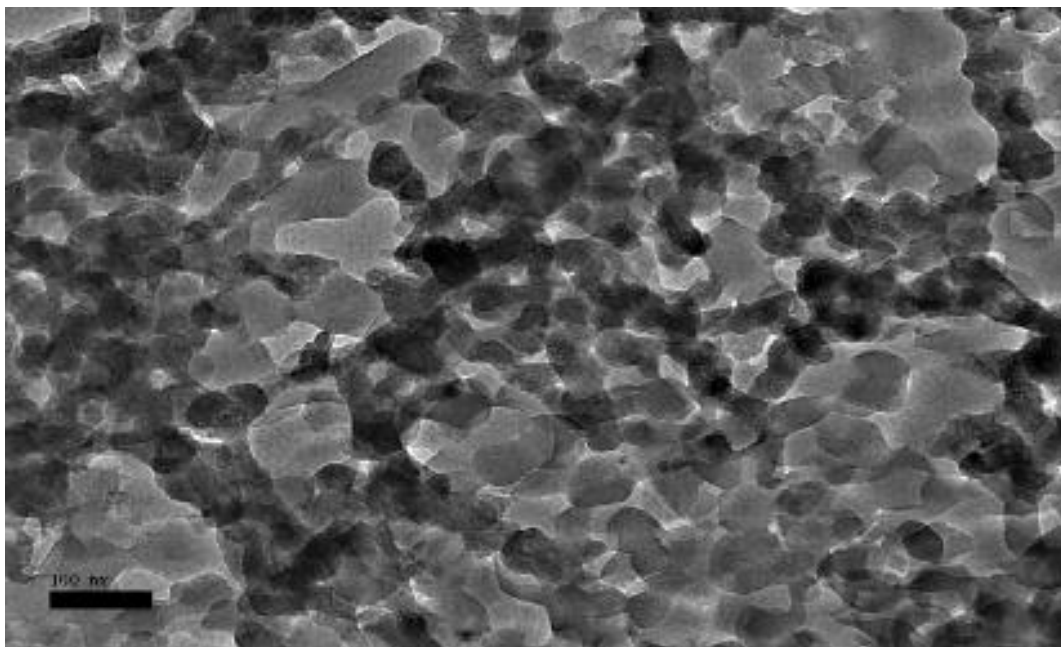

**Fig. S4.** Transmission electron microscope images of nZIF-8 particles after 24 h incubated in SLF pH 7.4 (A) and SLF pH 6.0 (B) with scale bar = 100 nm.

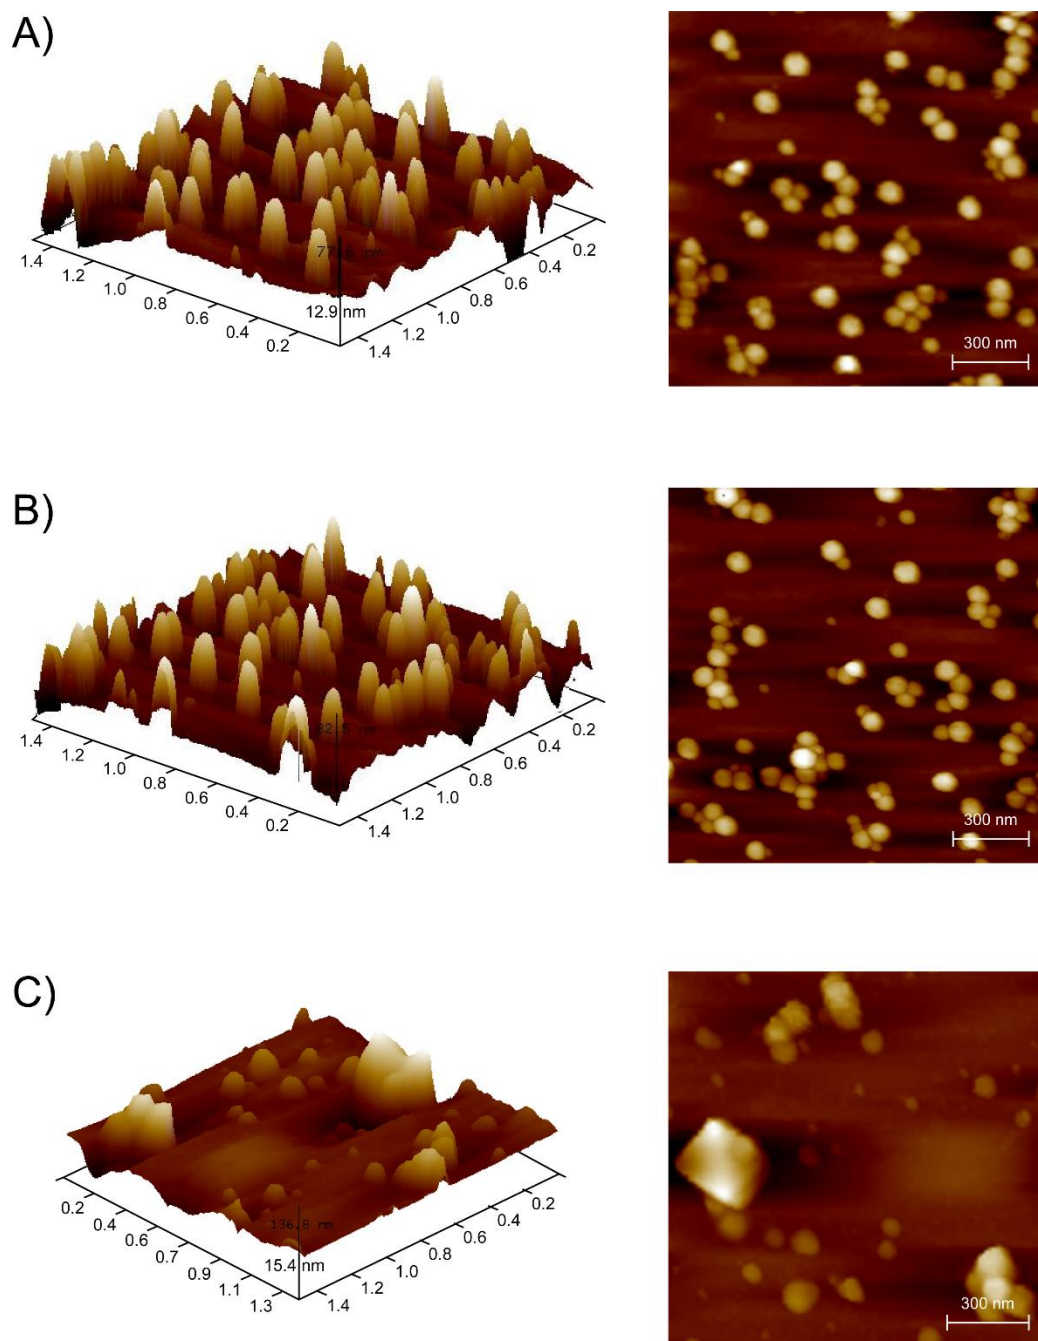

**Fig. S5.** Atomic force microscope images of nZIF-8 (A), GEMcnZIF-8 (B), and GEMcRGD@nZIF-8 (C) with the scale bar = 300 nm.

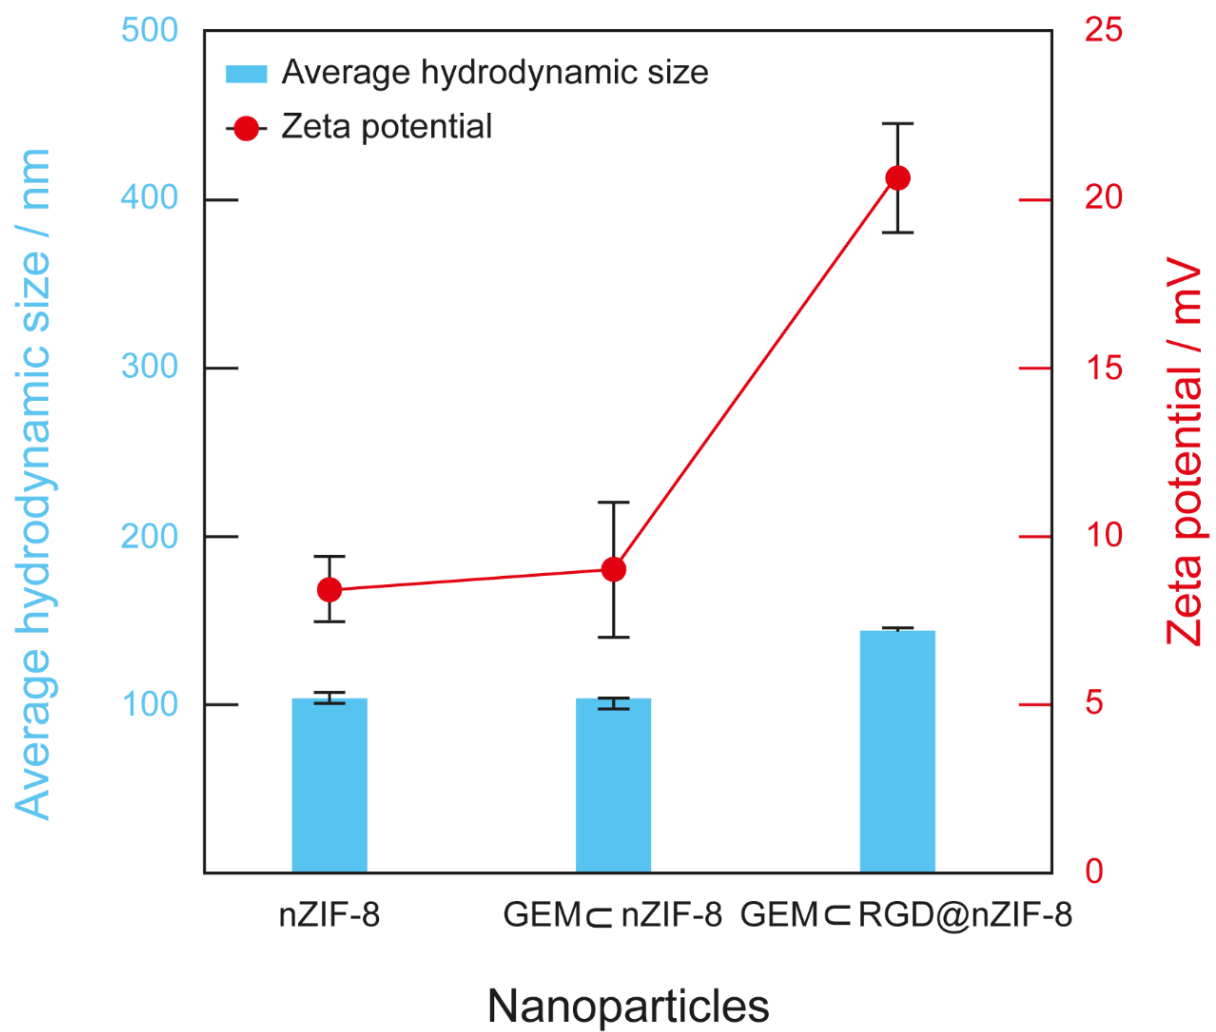

**Fig. S6.** Average hydrodynamic size (blue) and zeta potential (red) of nZIF-8, GEM⊂nZIF-8, and GEM⊂RGD@nZIF-8.
